# Supplementary material
Source: publisher figshare collection journal article supplement (https://gsajournals.figshare.com/ndownloader/files/13109789)
Supplement: Supplementary file 1 [file 13109789]

## Sheet: Sheet1
Table S6. The 138 polymorphisms with an LRT-1 value (test for parallel selection) that exceed the permutation threshold of 47.0.
The last column (Locus30?) identifies the subset of SNPs that wer most significant in each locus (as 1).
																							Standardized changes
chom	snp	Ref	Alt	pop	reads	pR	pop	reads	pR	pop	reads	pR	pop	reads	pR	pop	reads	pR	pop	reads	pR	LRT-1 (parallel test)	dA std	dB std	dC std	gen0 p	gen15 p	change (abs)	Locus30?
Scf_2L	3862348	A	T	A0	120	0.741667	B0	110	0.709091	C0	138	0.76087	A7	154	0.324675	B7	191	0.251309	C7	682	0.313783	87.0692	4.80576	5.37887	5.93124	0.737209	0.296589	0.44062	1
Scf_2L	3862350	T	A	A0	119	0.781513	B0	109	0.715596	C0	138	0.789855	A7	151	0.344371	B7	187	0.304813	C7	676	0.368343	80.2666	5.07885	4.76981	5.63852	0.762321	0.339176	0.423146	0
Scf_2L	3921432	C	T	A0	118	0.584746	B0	96	0.489583	C0	139	0.625899	A7	141	0.22695	B7	166	0.144578	C7	570	0.180702	69.9398	4.11976	4.20993	6.00891	0.566743	0.184077	0.382666	0
Scf_2L	9691228	T	A	A0	115	0.834783	B0	105	0.838095	C0	124	0.862903	A7	108	0.509259	B7	168	0.583333	C7	541	0.484288	50.9827	3.80316	3.19142	5.25092	0.84526	0.525627	0.319633	1
Scf_2L	13898087	A	T	A0	125	0.304	B0	103	0.252427	C0	141	0.368794	A7	186	0.784946	B7	247	0.740891	C7	616	0.561688	63.327	-5.75254	-5.81995	-2.48074	0.308407	0.695842	0.387435	1
Scf_2L	19558407	G	A	A0	109	0.311927	B0	96	0.291667	C0	98	0.316327	A7	91	0.802198	B7	147	0.727891	C7	470	0.676596	70.2008	-5.33836	-4.88162	-4.38711	0.30664	0.735562	0.428922	0
Scf_2L	19558413	T	A	A0	110	0.318182	B0	95	0.252632	C0	98	0.316327	A7	92	0.804348	B7	146	0.726027	C7	468	0.673077	73.6998	-5.31115	-5.32127	-4.3417	0.295713	0.734484	0.438771	0
Scf_2L	19558425	T	C	A0	108	0.314815	B0	94	0.234043	C0	94	0.287234	A7	89	0.797753	B7	146	0.726027	C7	461	0.668113	78.1449	-5.22586	-5.54594	-4.61809	0.278697	0.730631	0.451934	0
Scf_2L	19558427	A	G	A0	102	0.303922	B0	94	0.234043	C0	94	0.276596	A7	87	0.793103	B7	147	0.727891	C7	457	0.66302	79.2558	-5.23257	-5.57223	-4.69238	0.27152	0.728005	0.456485	0
Scf_2L	19558428	T	A	A0	105	0.32381	B0	93	0.268817	C0	93	0.301075	A7	85	0.788235	B7	144	0.722222	C7	451	0.674058	69.5371	-4.95448	-5.05292	-4.50076	0.297901	0.728172	0.430271	0
Scf_2L	19558431	A	C	A0	103	0.300971	B0	91	0.241758	C0	95	0.284211	A7	85	0.8	B7	145	0.731034	C7	446	0.661435	77.999	-5.34024	-5.47748	-4.57721	0.275647	0.730823	0.455177	0
Scf_2L	19600772	T	C	A0	160	0.28125	B0	127	0.188976	C0	167	0.341317	A7	119	0.638655	B7	168	0.595238	C7	737	0.606513	51.366	-4.09871	-4.9153	-3.52624	0.270515	0.613469	0.342954	0
Scf_2L	19600781	G	A	A0	149	0.288591	B0	118	0.161017	C0	157	0.369427	A7	121	0.661157	B7	169	0.60355	C7	710	0.61831	53.9345	-4.25006	-5.3822	-3.26948	0.273011	0.627672	0.354661	0
Scf_2L	19600793	A	G	A0	160	0.29375	B0	127	0.204724	C0	167	0.383234	A7	116	0.672414	B7	171	0.602339	C7	717	0.620642	48.6119	-4.32671	-4.78031	-3.1418	0.293903	0.631798	0.337896	0
Scf_2L	19881159	G	T	A0	136	0.117647	B0	144	0.118056	C0	160	0.1375	A7	124	0.419355	B7	127	0.456693	C7	521	0.380038	47.12	-3.91148	-4.3873	-3.66595	0.124401	0.418695	0.294295	0
Scf_2L	20600714	T	A	A0	96	0.614583	B0	96	0.645833	C0	91	0.703297	A7	97	0.917526	B7	147	0.952381	C7	507	0.954635	53.296	-3.87693	-4.51308	-4.25464	0.654571	0.941514	0.286943	0
Scf_2L	20794689	G	A	A0	106	0.811321	B0	86	0.848837	C0	109	0.834862	A7	86	1	B7	141	1	C7	503	1	64.6024	-4.58238	-4.22571	-5.08769	0.831673	1	0.168327	0
Scf_2L	20794693	A	G	A0	108	0.777778	B0	89	0.831461	C0	110	0.836364	A7	83	1	B7	140	1	C7	500	0.998	64.7473	-4.99011	-4.49822	-4.52516	0.815201	0.999333	0.184133	0
Scf_2L	20925091	A	G	A0	112	0.678571	B0	96	0.65625	C0	124	0.725806	A7	128	0.96875	B7	209	0.956938	C7	689	0.936139	55.0684	-4.60115	-4.65265	-3.7088	0.686876	0.953942	0.267066	0
Scf_2L	20925104	T	C	A0	112	0.651786	B0	92	0.641304	C0	120	0.641667	A7	139	0.971223	B7	211	0.924171	C7	719	0.937413	64.4925	-5.03261	-4.02223	-4.85901	0.644919	0.944269	0.29935	0
Scf_2L	21050598	A	G	A0	120	0.783333	B0	153	0.777778	C0	124	0.717742	A7	159	0.987421	B7	207	0.956522	C7	675	0.958519	47.5514	-4.15516	-3.33475	-4.45097	0.759618	0.967487	0.20787	0
Scf_2L	21050615	T	G	A0	104	0.711538	B0	135	0.718519	C0	112	0.633929	A7	143	0.986014	B7	175	0.948571	C7	604	0.951987	64.8974	-4.8634	-3.80832	-5.27102	0.687995	0.962191	0.274196	0
Scf_2L	21192901	T	A	A0	90	0.722222	B0	80	0.6375	C0	91	0.659341	A7	97	0.979381	B7	175	0.942857	C7	488	0.956967	59.7303	-4.1723	-4.31346	-4.87053	0.673021	0.959735	0.286714	0
Scf_2L	21430148	G	T	A0	140	0.414286	B0	159	0.465409	C0	159	0.433962	A7	91	0.758242	B7	146	0.794521	C7	454	0.755507	48.906	-3.79322	-4.02702	-4.28242	0.437886	0.769423	0.331537	0
Scf_2L	21562005	T	A	A0	112	0.660714	B0	91	0.681319	C0	102	0.754902	A7	97	0.969072	B7	160	0.975	C7	487	0.971253	60.9512	-4.64967	-4.76735	-4.17209	0.698978	0.971775	0.272797	0
Scf_2L	21589185	A	T	A0	90	0.7	B0	89	0.595506	C0	88	0.659091	A7	86	0.918605	B7	117	0.974359	C7	473	0.915433	49.8969	-2.89818	-5.51108	-3.83229	0.651532	0.936132	0.2846	0
Scf_2L	21742342	T	C	A0	83	0.433735	B0	91	0.43956	C0	121	0.31405	A7	101	0.693069	B7	133	0.781955	C7	505	0.766337	53.0573	-2.66861	-3.82247	-5.83087	0.395782	0.74712	0.351339	0
Scf_2L	21742348	A	G	A0	131	0.366412	B0	124	0.483871	C0	176	0.272727	A7	114	0.684211	B7	141	0.780142	C7	559	0.758497	65.1431	-3.52312	-3.49644	-6.64071	0.374337	0.74095	0.366613	0
Scf_2L	21766483	A	T	A0	139	0.791367	B0	160	0.76875	C0	159	0.792453	A7	118	0.991525	B7	176	0.994318	C7	580	0.991379	66.7479	-4.20313	-5.01152	-4.9151	0.78419	0.992408	0.208218	0
Scf_2L	22052240	G	T	A0	98	0.642857	B0	102	0.539216	C0	110	0.518182	A7	142	0.887324	B7	185	0.875676	C7	550	0.94	65.7435	-3.20416	-4.29931	-6.34862	0.566752	0.901	0.334248	0
Scf_2L	22052252	A	T	A0	91	0.648352	B0	99	0.535354	C0	104	0.548077	A7	146	0.910959	B7	183	0.885246	C7	545	0.946789	67.8474	-3.53471	-4.48216	-6.10084	0.577261	0.914331	0.337071	0
Scf_2L	22110370	A	G	A0	91	0.725275	B0	111	0.765766	C0	122	0.762295	A7	151	0.97351	B7	169	0.994083	C7	726	0.991736	67.5556	-4.14959	-4.7929	-5.24098	0.751112	0.986443	0.235331	0
Scf_2L	22181460	A	G	A0	119	0.789916	B0	134	0.858209	C0	153	0.810458	A7	105	1	B7	184	1	C7	569	0.98594	62.384	-5.06649	-4.4656	-4.26366	0.819527	0.995313	0.175786	0
Scf_2L	22339369	G	A	A0	109	0.53211	B0	88	0.568182	C0	139	0.431655	A7	87	0.885057	B7	129	0.782946	C7	440	0.843182	51.7229	-4.17585	-2.44539	-5.61058	0.510649	0.837062	0.326413	0
Scf_2L	22356363	A	C	A0	109	0.201835	B0	91	0.164835	C0	112	0.196429	A7	90	0.522222	B7	140	0.542857	C7	409	0.508557	47.5759	-3.52027	-4.37737	-4.05442	0.1877	0.524546	0.336846	0
Scf_2L	22374940	A	T	A0	90	0.788889	B0	131	0.763359	C0	119	0.747899	A7	155	1	B7	208	0.995192	C7	702	0.992877	82.4093	-5.1063	-5.11279	-5.50534	0.766716	0.996023	0.229308	1
Scf_2L	23357534	A	G	A0	115	0.104348	B0	100	0.15	C0	146	0.143836	A7	95	0.463158	B7	99	0.494949	C7	434	0.486175	58.2785	-4.38519	-3.97317	-4.83411	0.132728	0.481428	0.3487	0
Scf_2R	115709	A	T	A0	123	0.699187	B0	82	0.743902	C0	129	0.612403	A7	142	0.964789	B7	224	0.964286	C7	719	0.933241	58.2473	-4.3615	-3.6112	-5.14937	0.685164	0.954105	0.268941	0
Scf_2R	330873	T	A	A0	165	0.666667	B0	114	0.640351	C0	148	0.601351	A7	81	0.864198	B7	170	0.917647	C7	435	0.956322	52.7609	-2.52686	-3.84403	-5.93834	0.636123	0.912722	0.276599	0
Scf_2R	751684	C	G	A0	133	0.616541	B0	115	0.591304	C0	134	0.641791	A7	113	0.920354	B7	146	0.917808	C7	567	0.887125	49.4198	-4.17256	-4.34075	-3.7429	0.616546	0.908429	0.291884	0
Scf_2R	751687	G	A	A0	133	0.62406	B0	112	0.580357	C0	132	0.636364	A7	112	0.910714	B7	144	0.916667	C7	559	0.887299	48.4043	-3.89372	-4.41719	-3.80677	0.613594	0.904893	0.2913	0
Scf_2R	751692	A	G	A0	123	0.609756	B0	108	0.555556	C0	125	0.616	A7	107	0.906542	B7	144	0.916667	C7	524	0.881679	51.5003	-3.91574	-4.66359	-3.91848	0.593771	0.901629	0.307859	0
Scf_2R	752645	C	A	A0	103	0.572816	B0	100	0.4	C0	105	0.552381	A7	101	0.891089	B7	157	0.796178	C7	479	0.847599	50.5044	-3.92491	-4.44799	-3.9729	0.508399	0.844956	0.336557	0
Scf_2R	851594	A	G	A0	110	0.490909	B0	89	0.651685	C0	97	0.670103	A7	126	0.936508	B7	175	0.885714	C7	649	0.90755	51.5431	-5.84366	-3.02551	-3.61048	0.604233	0.909924	0.305692	0
Scf_2R	851622	T	A	A0	100	0.4	B0	82	0.597561	C0	97	0.556701	A7	129	0.930233	B7	178	0.893258	C7	679	0.905744	77.9614	-6.62896	-3.69907	-4.97113	0.518087	0.909745	0.391658	0
Scf_2R	1090092	A	G	A0	130	0.846154	B0	118	0.940678	C0	133	0.842105	A7	129	1	B7	156	1	C7	603	1	51.2152	-4.46848	-2.67712	-5.12027	0.876312	1	0.123688	0
Scf_2R	1357032	A	T	A0	114	0.245614	B0	121	0.214876	C0	100	0.26	A7	123	0.617886	B7	167	0.682635	C7	629	0.535771	55.535	-4.18539	-5.38631	-3.42664	0.240163	0.612097	0.371934	0
Scf_2R	1357040	C	T	A0	119	0.226891	B0	128	0.210938	C0	104	0.240385	A7	123	0.585366	B7	166	0.668675	C7	621	0.516908	54.687	-4.08636	-5.30877	-3.49453	0.226071	0.590316	0.364245	0
Scf_2R	1357048	T	G	A0	120	0.216667	B0	127	0.204724	C0	103	0.223301	A7	119	0.546218	B7	160	0.65	C7	604	0.501656	51.3648	-3.77838	-5.15303	-3.54574	0.214897	0.565958	0.351061	0
Scf_2R	1357053	T	C	A0	120	0.216667	B0	123	0.178862	C0	104	0.230769	A7	115	0.53913	B7	158	0.64557	C7	586	0.486348	50.3097	-3.68515	-5.43613	-3.25697	0.208766	0.557016	0.34825	0
Scf_2R	1444639	C	A	A0	87	0.770115	B0	98	0.734694	C0	96	0.75	A7	131	0.984733	B7	201	0.965174	C7	648	0.983025	52.0348	-3.95265	-3.82851	-4.67486	0.751603	0.977644	0.226041	0
Scf_2R	1675896	A	T	A0	99	0.575758	B0	85	0.541176	C0	124	0.475806	A7	85	0.894118	B7	140	0.942857	C7	484	0.847107	65.673	-3.829	-5.17165	-5.01759	0.530913	0.894694	0.363781	0
Scf_2R	1675906	A	T	A0	102	0.578431	B0	91	0.593407	C0	125	0.504	A7	86	0.895349	B7	139	0.942446	C7	489	0.854806	59.3613	-3.84337	-4.66503	-4.81141	0.558613	0.897534	0.338921	0
Scf_2R	1675907	C	T	A0	103	0.582524	B0	91	0.593407	C0	126	0.507937	A7	86	0.895349	B7	140	0.942857	C7	488	0.854508	58.6748	-3.80582	-4.67745	-4.76306	0.561289	0.897571	0.336282	0
Scf_2R	1774017	C	G	A0	84	0.678571	B0	81	0.617284	C0	107	0.607477	A7	119	0.92437	B7	154	0.948052	C7	582	0.914089	51.8715	-3.35238	-4.4997	-4.58955	0.634444	0.928837	0.294393	0
Scf_2R	1780791	C	T	A0	130	0.376923	B0	117	0.307692	C0	177	0.288136	A7	128	0.601562	B7	220	0.672727	C7	691	0.704776	52.3224	-2.51018	-4.17922	-5.61923	0.32425	0.659688	0.335438	0
Scf_2R	1841602	T	C	A0	92	0.434783	B0	86	0.465116	C0	101	0.415842	A7	80	0.8125	B7	144	0.826389	C7	398	0.874372	67.1968	-4.00625	-4.03491	-5.99163	0.43858	0.837754	0.399173	0
Scf_2R	1915106	G	T	A0	137	0.518248	B0	125	0.672	C0	154	0.62987	A7	82	0.926829	B7	129	0.953488	C7	431	0.914153	63.39	-5.15673	-4.21636	-4.50124	0.606706	0.93149	0.324784	0
Scf_2R	2404114	G	A	A0	117	0.547009	B0	96	0.677083	C0	110	0.690909	A7	180	0.244444	B7	186	0.33871	C7	704	0.296875	50.3828	3.57011	3.70705	4.94748	0.638334	0.293343	0.344991	0
Scf_2R	2453379	A	G	A0	119	0.378151	B0	95	0.326316	C0	104	0.451923	A7	150	0.773333	B7	188	0.75	C7	646	0.80031	62.9932	-4.5972	-4.71221	-4.46883	0.385463	0.774548	0.389084	0
Scf_2R	2567809	T	C	A0	143	0.58042	B0	132	0.704545	C0	165	0.660606	A7	95	0.978947	B7	167	0.91018	C7	506	0.936759	62.184	-6.00893	-3.00028	-4.71385	0.648524	0.941962	0.293438	0
Scf_2R	3195097	C	T	A0	112	0.348214	B0	107	0.476636	C0	124	0.395161	A7	99	0.89899	B7	160	0.85	C7	487	0.928131	116.313	-6.48353	-4.42654	-7.62438	0.40667	0.892374	0.485703	1
Scf_2R	3195101	A	G	A0	107	0.327103	B0	106	0.471698	C0	120	0.441667	A7	96	0.895833	B7	157	0.866242	C7	485	0.931959	113.867	-6.5971	-4.71633	-7.0993	0.413489	0.898011	0.484522	0
Scf_2R	3197961	A	T	A0	161	0.52795	B0	132	0.515152	C0	141	0.560284	A7	80	0.9125	B7	117	0.888889	C7	392	0.895408	68.3825	-4.83133	-4.59975	-4.91268	0.534462	0.898932	0.364471	0
Scf_2R	3205249	T	G	A0	110	0.781818	B0	90	0.833333	C0	108	0.787037	A7	107	1	B7	157	0.974522	C7	492	0.98374	49.0944	-5.15625	-2.72869	-4.23578	0.80073	0.986087	0.185358	0
Scf_2R	3205272	A	C	A0	130	0.776923	B0	106	0.622642	C0	128	0.734375	A7	112	0.375	B7	175	0.314286	C7	566	0.348057	56.2782	4.57249	3.40534	4.95209	0.711313	0.345781	0.365532	0
Scf_2R	6635052	T	G	A0	103	0.466019	B0	81	0.432099	C0	92	0.597826	A7	151	0.0331126	B7	169	0.0236686	C7	548	0.0291971	140.876	6.21742	5.83916	8.36453	0.498648	0.0286594	0.469989	1
Scf_2R	10209531	A	C	A0	145	0.655172	B0	111	0.675676	C0	165	0.70303	A7	94	0.968085	B7	137	0.970803	C7	467	0.929336	58.2904	-4.8146	-4.6278	-3.92596	0.677959	0.956075	0.278115	1
Scf_2R	12942082	C	A	A0	163	0.828221	B0	137	0.839416	C0	145	0.827586	A7	118	0.322034	B7	158	0.341772	C7	598	0.414716	102.544	6.06499	5.92251	5.61716	0.831741	0.359507	0.472234	0
Scf_2R	12942083	T	G	A0	162	0.833333	B0	134	0.858209	C0	142	0.84507	A7	110	0.336364	B7	149	0.362416	C7	565	0.437168	100.594	5.90966	5.92435	5.60163	0.845538	0.378649	0.466888	0
Scf_2R	12942094	G	C	A0	161	0.832298	B0	133	0.827068	C0	142	0.816901	A7	124	0.306452	B7	167	0.329341	C7	602	0.405316	104.611	6.34801	5.89581	5.54613	0.825422	0.347036	0.478386	1
Scf_2R	15248177	T	A	A0	97	0.536082	B0	97	0.484536	C0	90	0.622222	A7	159	0.867925	B7	208	0.889423	C7	698	0.873926	52.6891	-4.11116	-5.00853	-3.52032	0.547614	0.877091	0.329477	1
Scf_3L	4223356	G	C	A0	135	0.659259	B0	97	0.659794	C0	135	0.592593	A7	112	0.955357	B7	166	0.96988	C7	633	0.957346	69.8493	-4.14928	-4.53832	-5.6884	0.637215	0.960861	0.323646	1
Scf_3L	6052504	G	T	A0	157	0.522293	B0	89	0.595506	C0	113	0.477876	A7	105	0.971429	B7	179	0.927374	C7	562	0.855872	74.5547	-6.03186	-4.18945	-4.77821	0.531892	0.918225	0.386333	1
Scf_3L	7862072	T	C	A0	120	0.666667	B0	98	0.632653	C0	135	0.703704	A7	113	0.362832	B7	224	0.21875	C7	650	0.315385	50.7466	3.08934	4.4795	4.68919	0.667674	0.298989	0.368686	1
Scf_3L	9206980	G	T	A0	93	0.967742	B0	99	1	C0	103	1	A7	80	0.875	B7	150	0.7	C7	380	0.842105	50.0898	1.68484	5.83536	4.54461	0.989247	0.805702	0.183546	1
Scf_3L	11278353	C	T	A0	99	0.69697	B0	90	0.722222	C0	102	0.715686	A7	130	0.346154	B7	125	0.264	C7	590	0.286441	58.642	3.56208	4.65631	4.99956	0.711626	0.298865	0.412761	0
Scf_3L	11278359	C	G	A0	92	0.76087	B0	85	0.752941	C0	99	0.757576	A7	123	0.357724	B7	123	0.276423	C7	569	0.300527	68.0781	4.09601	4.81617	5.33113	0.757129	0.311558	0.445571	1
Scf_3L	11278362	A	T	A0	84	0.75	B0	80	0.7375	C0	96	0.75	A7	123	0.349593	B7	122	0.278689	C7	564	0.294326	64.6513	4.00619	4.57705	5.28123	0.745833	0.307536	0.438297	0
Scf_3L	23030585	T	A	A0	88	0.602273	B0	81	0.617284	C0	108	0.509259	A7	94	0.882979	B7	143	0.895105	C7	463	0.909287	47.51	-3.14899	-3.28911	-5.3054	0.576272	0.89579	0.319518	0
Scf_3L	23161028	C	G	A0	134	0.529851	B0	124	0.564516	C0	136	0.470588	A7	155	0.832258	B7	200	0.885	C7	692	0.868497	54.4016	-3.4816	-3.96292	-5.22965	0.521652	0.861918	0.340267	0
Scf_3L	23397111	A	C	A0	82	0.52439	B0	83	0.566265	C0	86	0.372093	A7	81	0.901235	B7	117	0.888889	C7	428	0.89486	67.6181	-4.05655	-3.64388	-6.34334	0.487583	0.894994	0.407412	0
Scf_3L	23403223	T	G	A0	123	0.512195	B0	107	0.570093	C0	132	0.454545	A7	93	0.946237	B7	135	0.896296	C7	444	0.918919	80.8561	-5.28207	-3.89873	-6.27849	0.512278	0.920484	0.408206	0
Scf_3L	23403227	A	T	A0	95	0.526316	B0	89	0.629213	C0	111	0.504505	A7	89	0.94382	B7	130	0.915385	C7	446	0.91704	65.8495	-4.92445	-3.52445	-5.52922	0.553345	0.925415	0.37207	0
Scf_3L	23412510	A	T	A0	120	0.691667	B0	121	0.644628	C0	123	0.617886	A7	83	0.975904	B7	96	0.989583	C7	408	0.97549	78.5327	-4.16586	-5.27405	-5.82348	0.651394	0.980326	0.328932	0
Scf_3L	23412516	A	G	A0	121	0.661157	B0	121	0.644628	C0	136	0.632353	A7	82	0.97561	B7	101	0.990099	C7	414	0.975845	81.0962	-4.46654	-5.33267	-5.74258	0.646046	0.980518	0.334472	1
Scf_3L	23412522	T	G	A0	141	0.794326	B0	133	0.766917	C0	155	0.735484	A7	81	0.987654	B7	107	1	C7	422	0.983412	60.2808	-3.49712	-5.06598	-4.84251	0.765576	0.990356	0.22478	0
Scf_3L	23579039	G	T	A0	103	0.38835	B0	83	0.385542	C0	129	0.387597	A7	84	0.738095	B7	124	0.806452	C7	464	0.762931	50.2769	-3.42365	-4.30469	-4.51305	0.387163	0.769159	0.381996	0
Scf_3L	23752401	A	G	A0	127	0.811024	B0	118	0.762712	C0	160	0.76875	A7	131	1	B7	173	0.99422	C7	591	0.998308	71.6947	-4.59548	-4.50164	-5.50994	0.780828	0.997509	0.216681	0
Scf_3L	23752413	A	T	A0	144	0.826389	B0	126	0.730159	C0	171	0.760234	A7	136	1	B7	171	0.994152	C7	584	0.998288	76.0806	-4.46272	-4.91783	-5.66591	0.772261	0.99748	0.225219	0
Scf_3L	23752433	T	C	A0	95	0.810526	B0	97	0.731959	C0	116	0.775862	A7	131	1	B7	164	0.993902	C7	539	0.998145	68.5928	-4.45047	-4.71317	-5.15652	0.772782	0.997349	0.224567	0
Scf_3L	23761617	G	C	A0	91	0.483516	B0	82	0.45122	C0	110	0.418182	A7	149	0.818792	B7	175	0.84	C7	636	0.800314	51.6913	-3.59921	-4.19556	-4.61805	0.450973	0.819702	0.36873	0
Scf_3L	24056190	G	T	A0	142	0.267606	B0	132	0.219697	C0	171	0.222222	A7	128	0.617188	B7	180	0.588889	C7	656	0.585366	51.5707	-3.71027	-4.08811	-4.59729	0.236508	0.597147	0.360639	0
Scf_3R	367845	T	C	A0	103	0.834951	B0	98	0.765306	C0	128	0.835938	A7	98	1	B7	154	0.980519	C7	469	0.989339	47.3411	-4.24163	-3.96679	-3.77901	0.812065	0.989953	0.177888	1
Scf_3R	11766158	G	A	A0	93	0.795699	B0	90	0.533333	C0	98	0.653061	A7	135	0.97037	B7	220	0.986364	C7	717	0.970711	80.5064	-3.07111	-6.99571	-5.35888	0.660698	0.975815	0.315117	1
Scf_3R	14055827	G	A	A0	102	0.647059	B0	83	0.554217	C0	92	0.597826	A7	110	0.927273	B7	156	0.897436	C7	485	0.88866	47.8068	-3.7302	-4.28426	-3.96876	0.599701	0.904456	0.304756	1
Scf_3R	15971225	T	A	A0	153	0.300654	B0	150	0.366667	C0	142	0.232394	A7	86	0.0116279	B7	141	0	C7	433	0.0300231	87.4141	4.90001	7.3814	4.00644	0.299905	0.0138837	0.286021	0
Scf_3R	16961782	T	A	A0	124	0.459677	B0	126	0.380952	C0	89	0.438202	A7	81	0	B7	120	0	C7	354	0.00564972	161.565	7.50586	7.26114	7.28588	0.426277	0.00188324	0.424394	1
Scf_3R	18966393	T	A	A0	132	0.166667	B0	125	0.152	C0	155	0.0967742	A7	138	0.456522	B7	184	0.434783	C7	673	0.439822	50.9146	-3.49447	-3.64493	-5.11548	0.13848	0.443709	0.305228	1
Scf_3R	22608914	G	A	A0	156	0.762821	B0	138	0.644928	C0	134	0.738806	A7	120	0.25	B7	163	0.343558	C7	490	0.253061	80.4601	5.86337	3.49566	6.16212	0.715518	0.282207	0.433312	1
Scf_3R	23075495	A	C	A0	149	0.52349	B0	97	0.525773	C0	149	0.503356	A7	124	0.895161	B7	167	0.88024	C7	564	0.856383	65.3929	-4.70305	-4.43263	-4.87114	0.51754	0.877261	0.359722	0
Scf_X	7541	C	A	A0	90	0.522222	B0	101	0.673267	C0	106	0.622642	A7	67	0.955224	B7	90	0.922222	C7	349	0.974212	69.2839	-5.41645	-3.3035	-5.64573	0.606044	0.950553	0.344509	0
Scf_X	820989	T	C	A0	67	0.358209	B0	68	0.558824	C0	80	0.475	A7	64	0.9375	B7	114	0.921053	C7	440	0.836364	72.8366	-6.32541	-4.34212	-4.28106	0.464011	0.898305	0.434295	1
Scf_X	2825727	T	G	A0	86	0.709302	B0	97	0.835052	C0	81	0.814815	A7	120	0.433333	B7	148	0.358108	C7	484	0.382231	60.8955	3.01653	5.46593	5.01932	0.78639	0.391224	0.395165	0
Scf_X	3094159	C	T	A0	84	0.654762	B0	60	0.65	C0	74	0.756757	A7	74	1	B7	108	0.990741	C7	364	0.972527	74.6253	-6.23254	-5.12717	-3.71448	0.687173	0.987756	0.300583	0
Scf_X	3094187	A	T	A0	121	0.876033	B0	78	0.769231	C0	89	0.775281	A7	83	1	B7	111	1	C7	386	0.987047	56.1575	-3.81859	-5.02796	-4.18633	0.806848	0.995682	0.188834	0
Scf_X	3860136	T	A	A0	113	0.300885	B0	100	0.26	C0	77	0.233766	A7	73	0.753425	B7	111	0.765766	C7	368	0.790761	93.3153	-4.84388	-5.523	-6.33638	0.264884	0.769984	0.5051	1
Scf_X	4273220	T	A	A0	73	0.739726	B0	64	0.734375	C0	75	0.8	A7	61	1	B7	110	1	C7	397	0.984887	63.3328	-5.03134	-5.24579	-3.64151	0.758034	0.994962	0.236929	0
Scf_X	4273222	T	A	A0	73	0.739726	B0	63	0.730159	C0	74	0.783784	A7	60	1	B7	111	1	C7	391	0.984655	65.4423	-5.01623	-5.28163	-3.8331	0.751223	0.994885	0.243662	0
Scf_X	4273224	T	C	A0	75	0.746667	B0	63	0.730159	C0	75	0.8	A7	61	1	B7	108	1	C7	384	0.984375	62.7829	-4.9768	-5.26625	-3.61485	0.758942	0.994792	0.23585	0
Scf_X	4273251	T	A	A0	66	0.727273	B0	64	0.71875	C0	76	0.789474	A7	65	1	B7	115	1	C7	382	0.986911	68.4304	-5.13857	-5.44091	-3.87706	0.745165	0.995637	0.250472	0
Scf_X	4273261	G	T	A0	66	0.712121	B0	63	0.746032	C0	74	0.783784	A7	67	1	B7	107	1	C7	379	0.986807	67.34	-5.32311	-5.08709	-3.92544	0.747312	0.995602	0.24829	0
Scf_X	4273268	G	A	A0	66	0.727273	B0	60	0.733333	C0	70	0.771429	A7	65	1	B7	109	1	C7	366	0.991803	70.4439	-5.13857	-5.18916	-4.29178	0.744012	0.997268	0.253256	0
Scf_X	7872843	T	A	A0	69	0.507246	B0	62	0.435484	C0	102	0.460784	A7	87	0.103448	B7	122	0.139344	C7	404	0.128713	49.3624	4.58438	3.29118	4.28128	0.467838	0.123835	0.344003	1
Scf_X	9051641	G	T	A0	103	0.407767	B0	95	0.242105	C0	124	0.274194	A7	63	0.84127	B7	85	0.8	C7	256	0.746094	86.7074	-4.63869	-5.91305	-5.57769	0.308022	0.795788	0.487766	1
Scf_X	9051678	A	C	A0	86	0.325581	B0	89	0.258427	C0	93	0.225806	A7	63	0.761905	B7	86	0.651163	C7	266	0.62782	56.2644	-4.39236	-4.01869	-4.57599	0.269938	0.680296	0.410357	0
Scf_X	9051686	A	G	A0	80	0.3	B0	83	0.240964	C0	88	0.215909	A7	62	0.758065	B7	84	0.666667	C7	264	0.625	60.7657	-4.55612	-4.32316	-4.6305	0.252291	0.683244	0.430953	0
Scf_X	9051688	T	A	A0	81	0.320988	B0	82	0.243902	C0	88	0.215909	A7	60	0.766667	B7	83	0.662651	C7	261	0.624521	58.7209	-4.4167	-4.23341	-4.62222	0.260266	0.684613	0.424346	0
Scf_X	10550413	A	G	A0	135	0.666667	B0	125	0.688	C0	122	0.737705	A7	64	0.3125	B7	117	0.376068	C7	364	0.321429	49.3122	3.70393	3.42647	4.96525	0.697457	0.336666	0.360792	0
Scf_X	11357723	T	G	A0	88	0.727273	B0	91	0.791209	C0	131	0.740458	A7	100	0.36	B7	148	0.432432	C7	484	0.371901	51.8007	3.95184	4.01084	4.483	0.75298	0.388111	0.364869	1
Scf_X	13340846	A	T	A0	79	0.443038	B0	68	0.485294	C0	82	0.47561	A7	126	0.793651	B7	151	0.874172	C7	556	0.805755	49.5632	-3.92131	-4.41771	-3.88512	0.467981	0.824526	0.356546	0
Scf_X	13340849	G	C	A0	79	0.455696	B0	69	0.507246	C0	83	0.506024	A7	126	0.81746	B7	156	0.897436	C7	561	0.818182	51.1568	-4.10492	-4.59072	-3.73468	0.489656	0.844359	0.354704	0
Scf_X	13844036	G	T	A0	93	0.591398	B0	78	0.717949	C0	92	0.673913	A7	78	0.987179	B7	146	0.958904	C7	438	0.954338	64.2204	-5.89117	-3.6707	-4.37022	0.661087	0.966807	0.305721	0
Scf_X	13844041	T	C	A0	97	0.618557	B0	81	0.728395	C0	90	0.677778	A7	78	0.987179	B7	145	0.958621	C7	457	0.958425	61.6166	-5.64134	-3.56322	-4.42564	0.67491	0.968075	0.293165	0
Scf_X	14713468	T	C	A0	67	0.567164	B0	69	0.637681	C0	64	0.46875	A7	92	0.141304	B7	124	0.145161	C7	415	0.156627	60.6354	4.61686	5.30977	3.60379	0.557865	0.147697	0.410168	0
Scf_X	15003537	T	A	A0	93	0.763441	B0	77	0.727273	C0	80	0.7625	A7	102	1	B7	143	0.993007	C7	414	0.997585	76.4818	-5.37229	-4.78601	-4.98689	0.751071	0.996864	0.245793	1
Scf_X	16106571	C	G	A0	104	0.384615	B0	169	0.195266	C0	151	0.298013	A7	115	0.721739	B7	170	0.7	C7	615	0.692683	74.3417	-3.78206	-6.19086	-4.90682	0.292632	0.704807	0.412176	0
Scf_X	16106745	C	A	A0	81	0.37037	B0	196	0.183673	C0	138	0.253623	A7	124	0.733871	B7	161	0.677019	C7	578	0.714533	84.5874	-3.96907	-6.12489	-5.72158	0.269222	0.708474	0.439252	0
Scf_X	16277095	C	T	A0	67	0.58209	B0	200	0.215	C0	165	0.254545	A7	106	0.811321	B7	146	0.767123	C7	566	0.80212	94.5853	-2.55003	-6.78411	-7.0809	0.350545	0.793521	0.442976	1
Scf_X	16291700	A	G	A0	101	0.732673	B0	113	0.787611	C0	120	0.833333	A7	84	0.380952	B7	132	0.424242	C7	397	0.483627	50.6108	3.76584	4.12896	4.40568	0.784539	0.429607	0.354932	0
Scf_X	16291875	T	C	A0	150	0.78	B0	121	0.859504	C0	150	0.82	A7	87	0.425287	B7	105	0.361905	C7	412	0.502427	63.5963	4.07541	5.72856	4.10722	0.819835	0.429873	0.389962	0
Scf_X	16292310	C	T	A0	121	0.917355	B0	124	0.927419	C0	168	0.922619	A7	73	0.69863	B7	128	0.648438	C7	376	0.601064	47.0489	3.00387	3.93841	4.82661	0.922465	0.649377	0.273087	0
Scf_X	17401461	A	G	A0	85	0.847059	B0	78	0.75641	C0	72	0.763889	A7	60	1	B7	106	1	C7	286	1	68.795	-3.84718	-5.15171	-5.31284	0.789119	1	0.210881	1
Scf_X	19622162	G	C	A0	110	0.454545	B0	109	0.513761	C0	99	0.393939	A7	122	0.827869	B7	153	0.869281	C7	476	0.85084	69.8878	-4.47281	-4.38228	-5.60412	0.454082	0.84933	0.395248	0
Scf_X	20248093	T	C	A0	139	0.553957	B0	123	0.593496	C0	165	0.527273	A7	74	0.864865	B7	124	0.862903	C7	407	0.874693	47.7391	-3.74579	-3.38	-4.76914	0.558242	0.867487	0.309245	0
Scf_X	20561008	T	A	A0	140	0.328571	B0	114	0.315789	C0	152	0.269737	A7	70	0.728571	B7	137	0.781022	C7	388	0.68299	71.9036	-4.30929	-5.28539	-5.07611	0.304699	0.730861	0.426162	1
Scf_X	20583572	A	T	A0	135	0.688889	B0	127	0.645669	C0	134	0.731343	A7	113	0.955752	B7	122	0.95082	C7	504	0.952381	52.783	-4.28241	-4.49196	-3.84591	0.688634	0.952984	0.26435	0
Scf_X	20789264	A	C	A0	78	0.641026	B0	97	0.731959	C0	110	0.618182	A7	73	0.931507	B7	112	0.964286	C7	404	0.95297	52.7281	-3.69774	-3.67457	-5.11071	0.663722	0.949588	0.285866	0
